# Supplementary material for: Two isomeric perylenothiophene diimides: physicochemical properties and applications in organic semiconducting devices
Source: Royal Society of Chemistry journal article supplement (doi:10.1039/c8tc05577g), 2019-01-01
Supplement: c8tc05577g1.pdf [file c8tc05577g1.pdf]

*Supporting Information for*

**Perylenothiophene Diimides: Physicochemical Properties and Applications in Organic Semiconducting Devices**

Masahiro Nakano,<sup>a\*</sup> Kyohei Nakano,<sup>b</sup> Kazuo Takimiya,<sup>a,c\*</sup> Keisuke Tajima<sup>b</sup>

<sup>a</sup>Emergent Molecular Function Research Group, RIKEN Center for Emergent Matter Science (CEMS), 2-1, Hirosawa, Wako, Saitama, 351-0198, Japan.

<sup>b</sup>Emergent Functional Polymers Research Team, RIKEN Center for Emergent Matter Science (CEMS), 2-1, Hirosawa, Wako, Saitama, 351-0198, Japan.

<sup>c</sup>Department of Chemistry, Graduate School of Science, Tohoku University, 6-3, Aoba, Aramaki, Aoba-ku, Sendai, 980-8578, Japan.

Contents

|                                                                                                                           |     |
|---------------------------------------------------------------------------------------------------------------------------|-----|
| 1. Synthesis of mono-halogenated PDIs                                                                                     | S2  |
| 2. Fabrication methods of organic devices                                                                                 | S5  |
| 3. Absorption and fluorescence spectra of NDI and PDI                                                                     | S7  |
| 4. Plausible mechanism of Na <sub>2</sub> S-promoted thiophene annulation                                                 | S8  |
| 5. Cyclic voltammograms                                                                                                   | S9  |
| 6. Absorption spectra of dPTIs and IDT-PTIs in thin film                                                                  | S9  |
| 7. Logarithmic absorption spectra and cyclic voltammograms of dPTIs and IDT-PTIs                                          | S10 |
| 8. Dihedral angles of $\alpha,\alpha'$ -linked thiophenes in the DFT-optimized molecular structures of dPTIs and IDT-PTIs | S10 |
| 9. DFT-calculated HOMO and LUMO of PTIs                                                                                   | S11 |
| 10. AFM images                                                                                                            | S12 |
| 11. Out-of-plane and in-plane XRD patterns of thin-film of $\pi$ -extended PTIs                                           | S13 |
| 12. Evaluation of carrier mobilities of IDT-PTIs in the thin films by space-charge-limited current (SCLC) technique       | S15 |
| 13. Out-of-plane and in-plane XRD patterns of IDT-PTI:PBDB-T                                                              | S16 |
| 14. Evaluation of carrier mobilities of blend films with IDT-PTIs:PBDB-T by SCLC technique                                | S17 |
| 15. Summarized device characteristics                                                                                     | S18 |
| 16. NMR charts                                                                                                            | S19 |
| 17. References                                                                                                            | S33 |

## 1. Synthesis of mono-halogenated PDIs

*N,N'*-Bis(1-pentylhexyl)-1-bromoperylene-3,4,9,10-tetracarboxydiimide (**1a**)<sup>1</sup> and *N,N'*-bis(1-pentylhexyl)-2-iodoperylene-3,4,9,10-tetracarboxydiimide (**1b**)<sup>2</sup> were synthesized from *N,N'*-bis(1-pentylhexyl)-perylene-3,4,9,10-tetracarboxydiimide<sup>3</sup> according to the reported procedures.

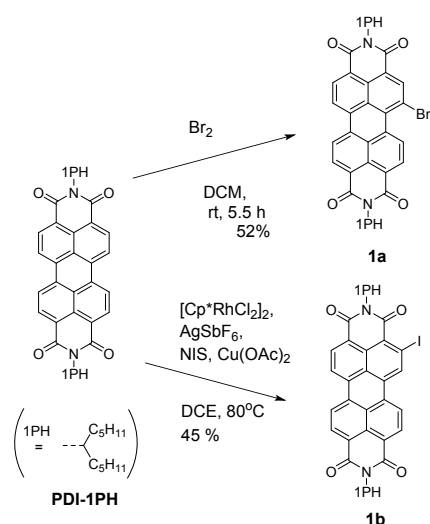

**Scheme S1.** Synthesis of **1a** and **1b**.

### *N,N'*-Bis(1-pentylhexyl)-1-bromoperylene-3,4,9,10-tetracarboxydiimide (**1a**)

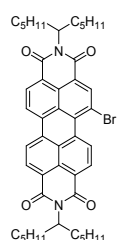

A mixture of *N,N'*-bis(1-pentylhexyl)-perylene-3,4,9,10-tetracarboxydiimide (3.86 g, 5.52 mmol) and bromine (33.7 g, 212 mmol) in 108 mL of dichloromethane was stirred at rt for 2 days. The mixture was quenched with diluted  $\text{NaHSO}_3$  aqueous solution (30 mL) and extracted with dichloromethane (100 mL). Then, the solvent was evaporated and the residue was purified by column chromatography on silica gel eluted with dichloromethane/hexane (1:1, v/v) to give **1a** as an orange

solid (4.60 g, 52%):  $^1\text{H}$  NMR (400 MHz,  $\text{CDCl}_3$ ):  $\delta$  9.79 (d,  $J$  = 8.0 Hz, 1H), 8.91 (s, 1H), 8.69–8.67 (m, 3H), 8.59–8.57 (m, 2H), 5.22–5.12 (m, 2H), 2.31–2.21 (m, 4H), 1.94–1.85 (m, 4H), 1.43–1.21 (m, 24H), 0.84 (t,  $J$  = 6.8 Hz, 6H), 0.83 (t,  $J$  = 6.8 Hz, 12H);  $^{13}\text{C}$  NMR (100 MHz,  $\text{CDCl}_3$ ): 163.9, 163.8, 163.1, 162.8, 139.2, 134.0, 133.7, 133.6, 131.1, 130.61, 130.55, 129.1, 128.9, 128.3, 128.2, 128.1, 127.2, 124.1, 124.0, 123.7, 123.3, 122.9, 122.6, 121.0, 55.1, 54.9, 32.5, 32.4, 31.74, 31.72, 26.63, 26.61, 22.5, 13.9; IR (KBr)  $\nu$  = 1701, 1661  $\text{cm}^{-1}$  (C=O); MP: 198.2–198.7  $^\circ\text{C}$ ; HRMS (APCI)  $m/z$  calcd for  $\text{C}_{46}\text{H}_{53}\text{BrN}_2\text{O}_4$ :  $[\text{M}]^+$  777.3267. Found: 777.3263.

***N,N'*-Bis(1-pentylhexyl)-2-iodoperylene-3,4,9,10-tetracarboxydiimide (1b)**

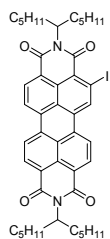

A mixture of  $[\text{Cp}^*\text{RhCl}_2]_2$  (152 mg, 0.248 mmol) and  $\text{AgSbF}_6$  (564 mg, 1.63 mmol) in dichloroethane (19 mL) was stirred at room temperature for 20 minutes. Then, *N,N'*-bis(1-pentylhexyl)-perylene-3,4,9,10-tetracarboxydiimide (3.30 g, 4.72 mmol), *N*-iodosuccinimide (1.385, 5.65 mmol),  $\text{Cu}(\text{OAc})_2$  (426 mg, 2.34 mmol), and dichloroethane (122 mL) was added and the mixture was stirred at 80  $^\circ\text{C}$  for 1 day. After cooling, the solvent was evaporated and the residue was purified by column chromatography on silica gel eluted with dichloromethane/hexane (1:3, v/v) to give **1b** as a red solid (1.75 g, 45%):  $^1\text{H}$  NMR (400 MHz,  $\text{CDCl}_3$ ):  $\delta$  9.12 (s, 1H), 8.69–8.64 (m, 3H), 8.57 (d,  $J$  = 8.0 Hz, 1H), 8.56 (d,  $J$  = 8.0 Hz, 1H), 8.52 (d,  $J$  = 8.0 Hz, 1H), 5.23–5.15 (m, 2H), 2.34–2.19 (m, 4H), 1.69–

1.83 (m, 4H), 1.44–1.23 (m, 24H), 0.86 (t,  $J = 6.8$  Hz, 6H), 0.85 (t,  $J = 6.8$  Hz, 6H);  $^{13}\text{C}$  NMR (100 MHz,  $\text{CDCl}_3$ ): 163.94, 163.86, 162.9, 162.1, 138.2, 137.9, 134.8, 134.2, 133.8, 133.0, 131.8, 131.6, 131.4, 130.9, 129.5, 126.42, 126.35, 124.3, 124.1, 124.0, 123.8, 123.4, 123.2, 123.0, 101.2, 55.6, 55.0, 32.5, 32.4, 31.8, 26.7, 22.5, 13.9; IR (KBr)  $\nu = 1699, 1659\text{ cm}^{-1}$  (C=O); MP: 207.2–208.2 °C; HRMS (APCI)  $m/z$  calcd for  $\text{C}_{46}\text{H}_{53}\text{IN}_2\text{O}_4$ :  $[\text{M}]^+$  825.3128 Found: 825.3130.

## 2. Fabrication methods of organic devices

### *Fabrication and characteristics of OFET devices*

dPTIa-, dPTIb-, IDT-PTIa-, and IDT-PTIb-based OFET devices were fabricated in a top-contact/bottom-gate (TCBG) configuration on a heavily doped  $n^+$ -Si (100) wafer with a 200 nm thermally grown  $\text{SiO}_2$  (capacitance:  $C_i = 17.3 \text{ nF cm}^{-2}$ ). The substrate was treated with octadecyltrichlorosilane (ODTS) as reported previously.<sup>4</sup> The dPTIa- and dPTIb- thin films were fabricated by the spin-coating method (6000 rpm, 30 sec) using chloroform solution (4 g/L) and following thermal annealing (100 °C or 200 °C, 30 min). On the top of the organic thin film, gold films (80 nm) as drain and source electrodes were deposited through a shadow mask. For a typical device, the drain-source channel length ( $L$ ) and width ( $W$ ) are 40  $\mu\text{m}$  and 1.5 mm, respectively. The device characteristics were measured at room temperature under ambient conditions with a Keithley 4200 semiconducting parameter analyzer. Field-effect mobility ( $\mu$ ) was calculated in the saturation regime using the following equation,

$$I_d = C_i \mu (W/2L) (V_g - V_{th})^2$$

where  $C_i$  is the capacitance of the  $\text{SiO}_2$  insulator, and  $V_g$  and  $V_{th}$  are the gate and threshold voltages, respectively.

### *Fabrication and characterization of OPV devices*

Patterned ITO substrates (purchased from Atsugi Micro) were first pre-cleaned sequentially by

sonicating in a detergent bath, de-ionized water, acetone, and isopropanol at room temperature, and in boiled isopropanol each for 10 min, and then baked at 120 °C for 10 minutes in air. The substrates were then subjected to a UV/ozone treatment at rt for 20 min. ZnO layer was prepared by spin-coating (at 5000 rpm, 30 sec.) a precursor solution prepared from zinc acetate dehydrate (0.27 g) and ethanolamine (0.07 mL) in 2-methoxyethanol (2.5 mL). Then, the substrates were annealed at 170 °C on a hot plate in air. The glass/ITO/ZnO substrate was transferred into a nitrogen-filled glove box (KOREA KIYON, KK-011AS-EXTRA). Active layer (IDT-PTI and PBDB-T) solution (chlorobenzene, 16 mg/ml, donor/acceptor weight ratio is 1:1) was spin-coated at 1200 rpm for 40 s on the substrate. Then, MoO<sub>x</sub> (7.5 nm) and Ag anode (100 nm) were deposited in vacuum to complete the solar cell devices. The active area of the cells was 0.16 cm<sup>2</sup>. *J-V* characteristics of the cells were measured using a Keithley 2400 source-measure unit in nitrogen atmosphere under the 1 sun (AM1.5G) condition using a solar simulator (SAN-EI Electric, XES-40S1). The light intensity was calibrated with a reference PV cell (KONICA MINOLTA AK-100 certified at National Institute of Advanced Industrial Science and Technology, Japan). The EQE of each device was measured with monochromatic light (SM-250F, Bunkoh-Keiki). More than 8 different devices were fabricated to collect the photovoltaic properties. AFM images were obtained on a Nanotechnology, Inc. scanning probe microscope Nanocute system. X-ray studies were carried out using a Rigaku Ultima IV diffractometer with a CuK $\alpha$  source ( $\lambda = 1.541 \text{ \AA}$ ).

### 3. Absorption and fluorescence spectra of NDI and PDI

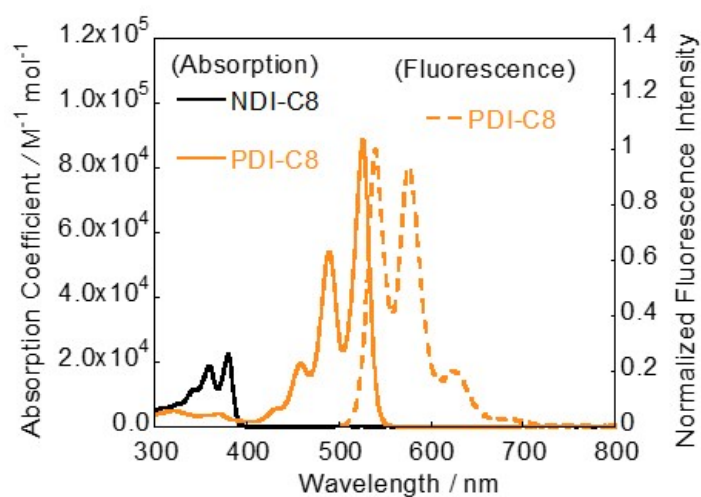

Figure S1. Absorption and fluorescence spectra of *N,N'*-dioctyl-NDI and *N,N'*-dioctyl-PDI in chloroform solution. *N,N'*-dioctyl-NDI did not show clear fluorescence.

#### 4. Plausible mechanism of Na<sub>2</sub>S-promoted thiophene annulation

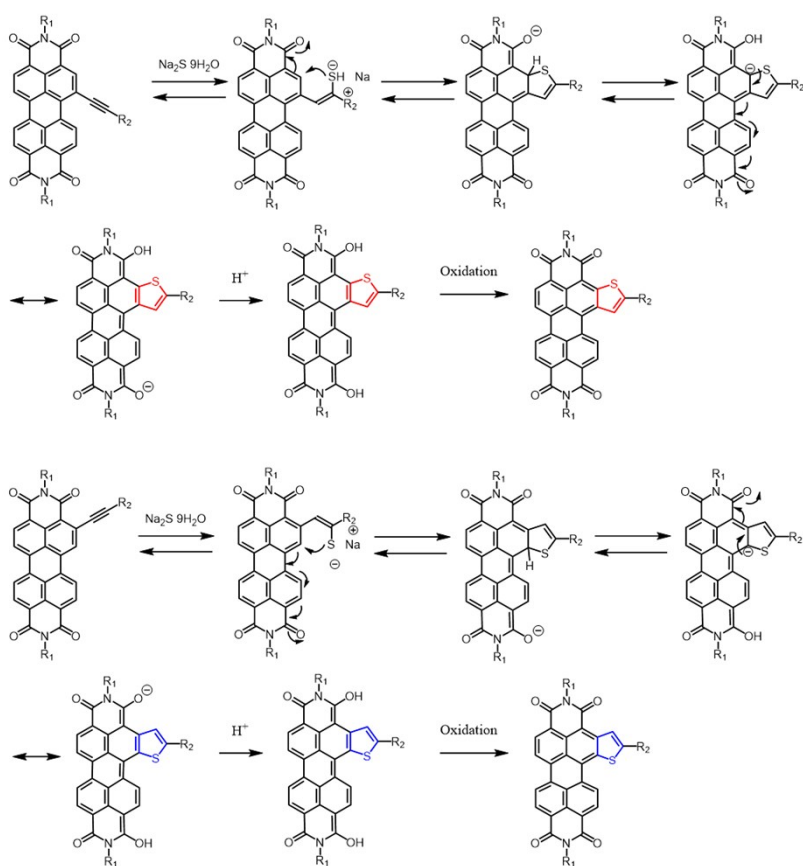

Figure S2. Plausible mechanism of Na<sub>2</sub>S-promoted thiophene annulation on PDI-core from **2a** and

**2b.**

## 5. Cyclic voltammograms

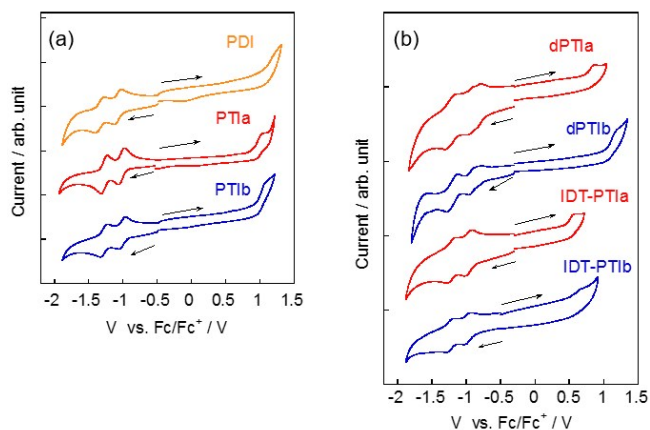

Figure S3. Cyclic voltammograms of PDI and PTIs (a) and dPTIs and IDT-PTIs(b)

## 6. Absorption spectra of dPTIs and IDT-PTIs in thin film

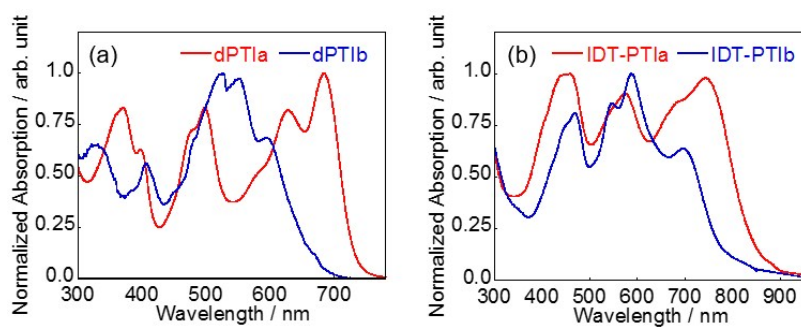

Figure S4. Absorption spectra of dPTIs (a) and IDT-PTIs (b) in thin film.

## 7. Logarithmic absorption spectra of dPTIs and IDT-PTIs

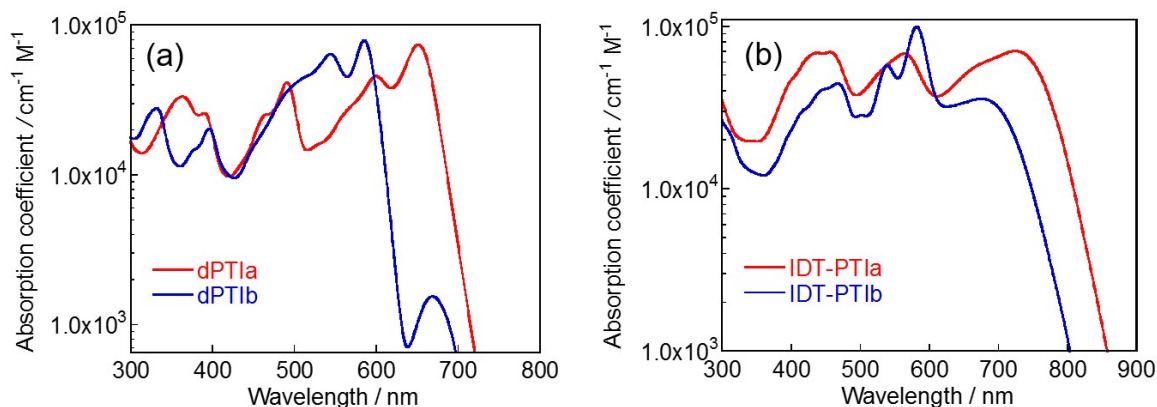

Figure S5. Logarithmic absorption spectra of dPTIs (a) and IDT-PTIs (b) in chloroform solution.

## 8. Dihedral angles of $\alpha,\alpha'$ -linked thiophenes in the DFT-optimized molecular structures of dPTIs and IDT-PTIs

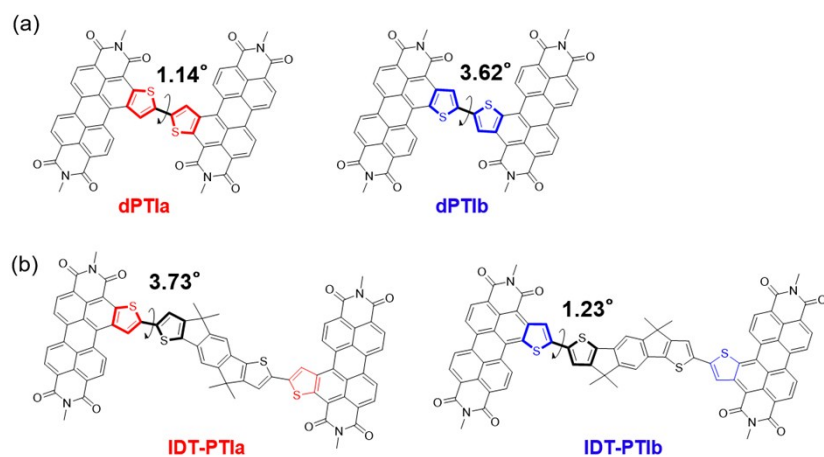

Figure S6. Dihedral angles of  $\alpha,\alpha'$ -linked thiophenes in the DFT-optimized molecular structures of dPTIs (a) and IDT-PTIs (b).

## 9. DFT-calculated HOMO and LUMO of PTIs

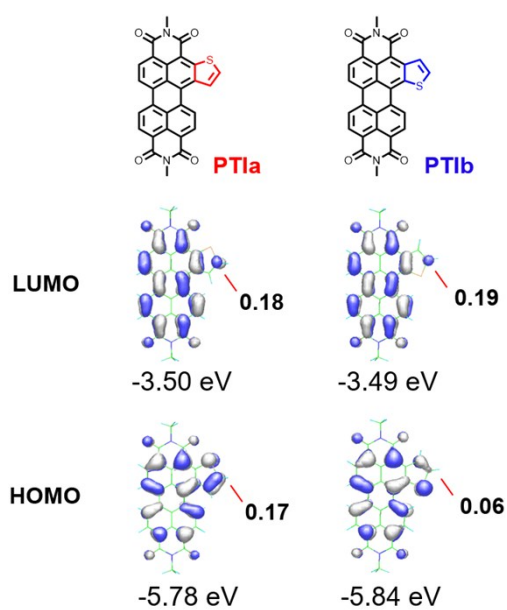

Figure S7. DFT-calculated HOMO and LUMO of PTIs and HOMO/LUMO coefficients at the  $\alpha$ -carbon atoms of the fused thiophenes (B3LYP/6-31G\*). The coefficients are given as absolute values.

## 10. AFM images

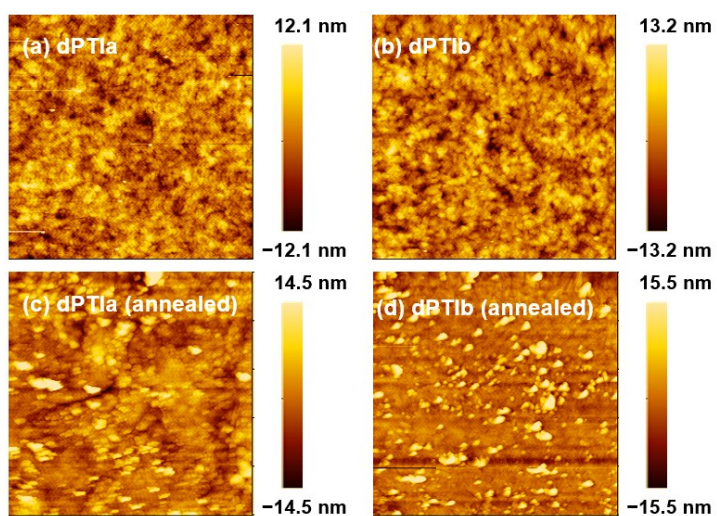

Figure S8. AFM images (5  $\mu\text{m} \times 5 \mu\text{m}$ ) of dPTIa- and dPTIb-based OFETs with and without annealing (200  $^{\circ}\text{C}$ ).

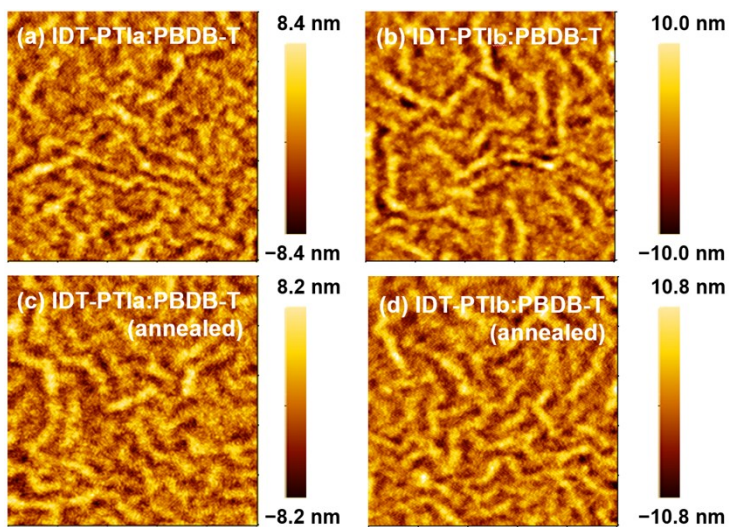

Figure S9. AFM images (5  $\mu\text{m} \times 5 \mu\text{m}$ ) of IDT-PTIa:PBDB-T- and IDT-PTIb:PBDB-T-based OFETs with and without annealing (200  $^{\circ}\text{C}$ ).

## 11. Out-of-plane and in-plane XRD patterns of thin-film of $\pi$ -extended PTIs

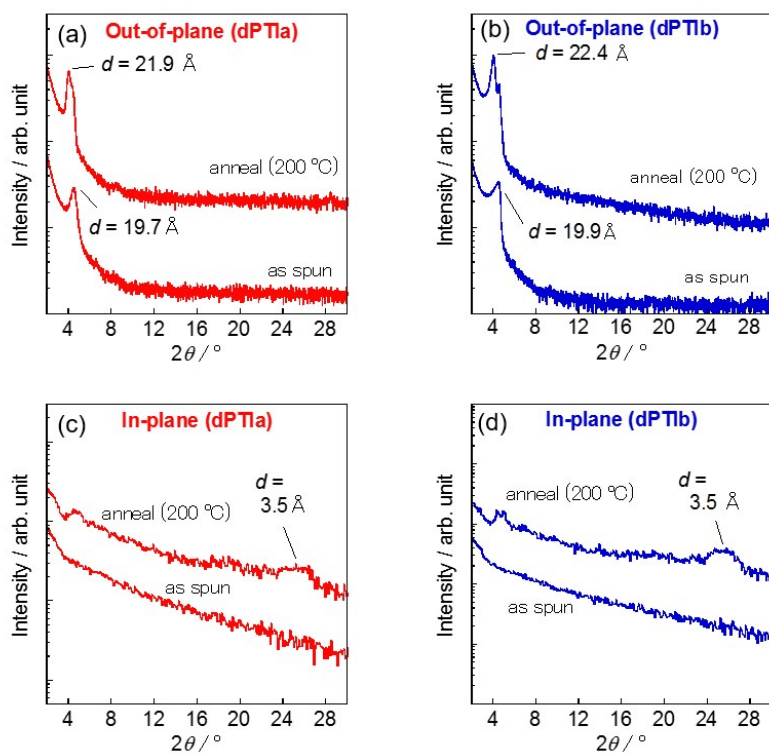

Figure S10. Out-of-plane XRD patterns of thin-film of dPTIa and dPTIb (a,b) and in-plane patterns of thin-film of dPTIa and dPTIb (c,d).

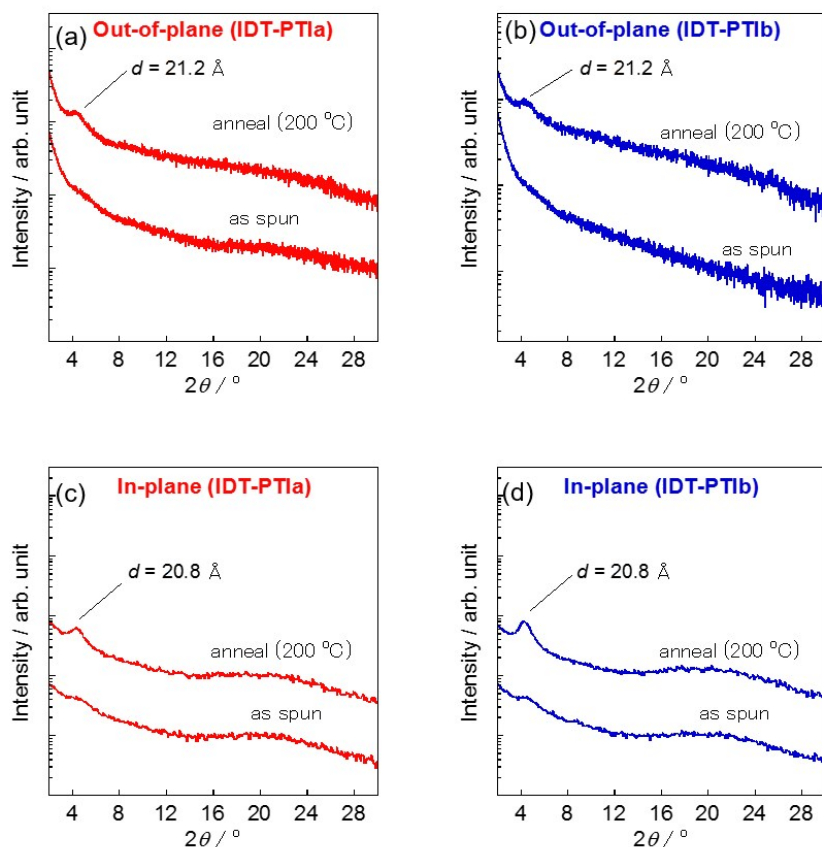

Figure S11. Out-of-plane XRD patterns of thin-film of IDT-PTIa and IDT-PTIb (a,b) and in-plane patterns of thin-film of IDT-PTIa and IDT-PTIb (c,d).

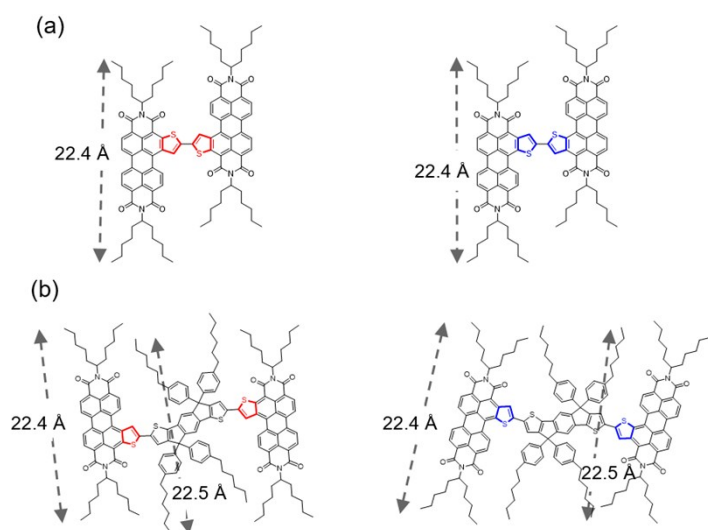

Figure S12. Molecular structures of dPTIs (a) and IDT-PTIs (b), and the distances between the edge of alkyl groups.

12. Evaluation of carrier mobilities of IDT-PTIs in the thin films by space-charge-limited current (SCLC) technique

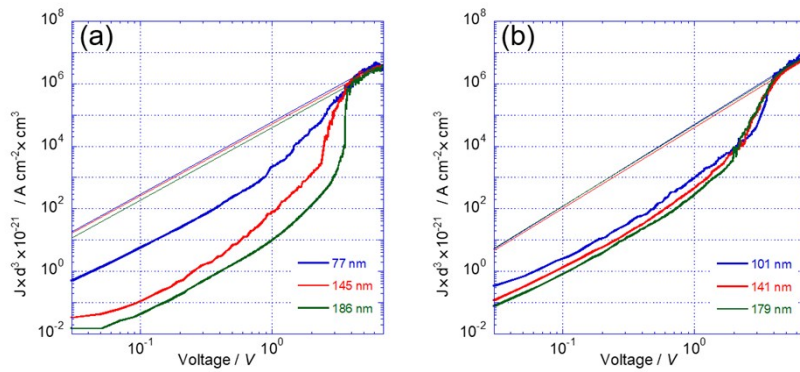

Figure S13. Current density normalized by the cube of the film thickness ( $d$ ) plotted against voltage for the electron-only devices with the thin films of (a) IDT-PTIa and (b) IDT-PTIb (annealed at 200 °C). The device structures of electron-only devices are ITO/ZnO/Active layer/Ca/Ag.

Table S1. Summary of the average slope of  $J$ - $V$  curves for analyzing the Mott-Gurney law, and the averaged electron mobility in SCLC region.

|                                                   | IDT-PTIa             | IDT-PTIb             |
|---------------------------------------------------|----------------------|----------------------|
| Slope                                             | 2.29                 | 2.57                 |
| $\mu_e / \text{cm}^2 \text{V}^{-1} \text{s}^{-1}$ | $4.8 \times 10^{-4}$ | $4.2 \times 10^{-4}$ |

### 13. Out-of-plane and in-plane XRD patterns of thin-film of IDT-PTI:PBDB-T

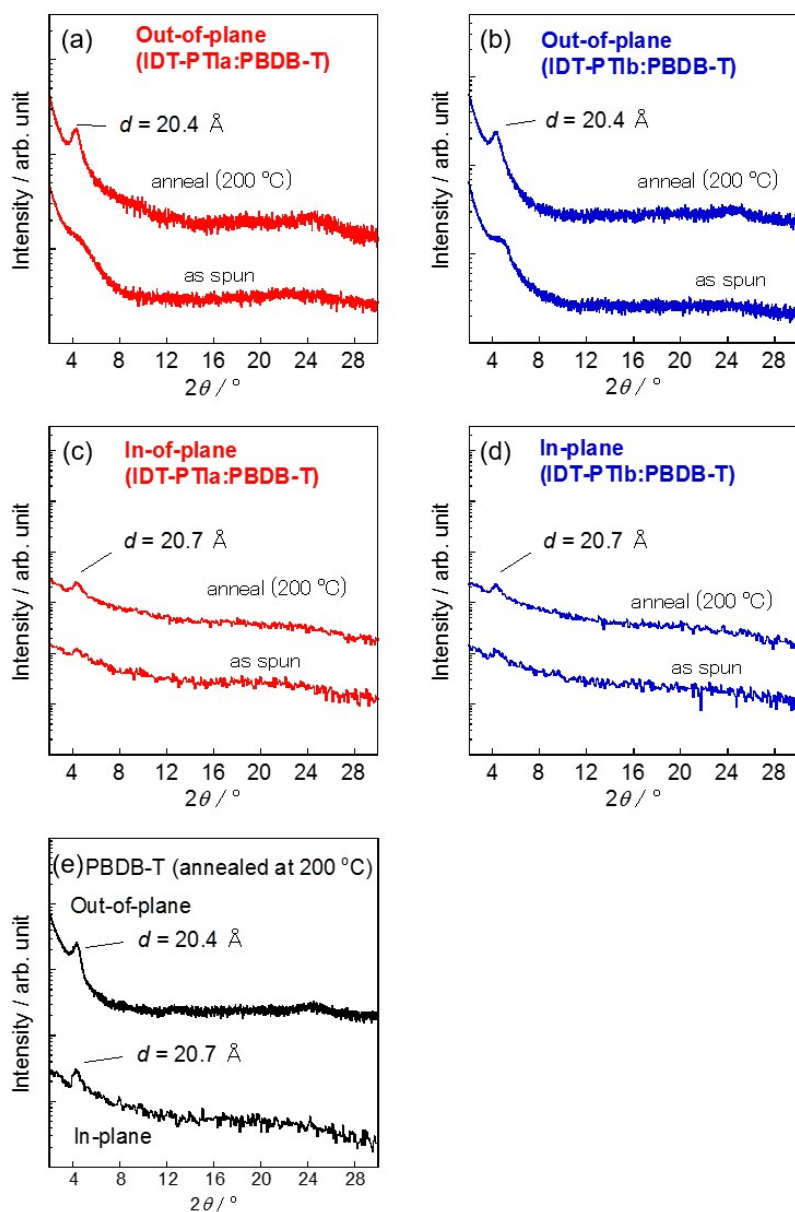

Figure S14. Out-of-plane XRD patterns of blend films of IDT-PTIa:PBDB-T and IDT-PTIb:PBDB-T and in-plane patterns of thin-film of IDT-PTIa:PBDB-T and IDT-PTIb:PBDB-T (c,d). XRD diffractions of PBDB-T (e).

#### 14. Evaluation of carrier mobilities of blend films with IDT-PTIs:PBDB-T by SCLC technique

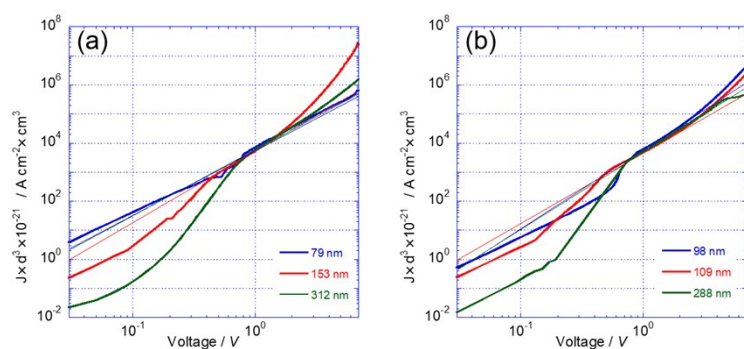

Figure S15. Current density normalized by the cube of the film thickness ( $d$ ) plotted against voltage for the electron-only devices with the blend films of (a) IDT-PTIa:PBDB-T and (b) IDT-PTIb:PBDB-T. The device structures of electron-only devices are ITO/ZnO/Active layer/Ca/Ag.

Table S2. Summary of the average slope of  $J$ - $V$  curves for analyzing the Mott-Gurney law, and the averaged electron mobility in SCLC region.

|                                                   | IDT-PTIa:PBDB-T      | IDT-PTIb:PBDB-T      |
|---------------------------------------------------|----------------------|----------------------|
| Slope                                             | 2.28                 | 2.62                 |
| $\mu_e / \text{cm}^2 \text{V}^{-1} \text{s}^{-1}$ | $6.3 \times 10^{-5}$ | $5.3 \times 10^{-5}$ |

## 15. Summarized device characteristics

Table S3. Summarized transistor characteristics of dPTI-based OFETs

| Compound | Anneal / °C | operation | $\mu_{FET} / \text{cm}^2\text{V}^{-1}\text{s}^{-1}$ | $\mu_{FET}^{max} / \text{cm}^2\text{V}^{-1}\text{s}^{-1}$ | $I_{on}/I_{off}$       | $V_{th} / \text{V}$ |
|----------|-------------|-----------|-----------------------------------------------------|-----------------------------------------------------------|------------------------|---------------------|
| dPTIa    | —           | n-channel | 0.0092±0.0012                                       | 0.0104                                                    | $\sim 1.5 \times 10^4$ | 12.3±2.8            |
|          |             | p-channel | 0.0004±0.0001                                       | 0.0005                                                    | $\sim 1.9 \times 10^2$ | -44.2±2.9           |
|          | 100         | n-channel | 0.0127±0.0041                                       | 0.0168                                                    | $\sim 1.5 \times 10^3$ | 10.1±5.2            |
|          |             | p-channel | 0.0031±0.0009                                       | 0.0040                                                    | $\sim 3.4 \times 10^2$ | -34.2±12.2          |
|          | 200         | n-channel | 0.0882±0.0040                                       | 0.0922                                                    | $\sim 5.0 \times 10^2$ | 13.3±3.3            |
|          |             | p-channel | 0.0198±0.0034                                       | 0.0232                                                    | $\sim 3.7 \times 10^2$ | -22.5±5.4           |
| dPTIb    | —           | n-channel | 0.0070±0.0014                                       | 0.0084                                                    | $\sim 1.8 \times 10^6$ | 1.6±2.3             |
|          |             | p-channel | —                                                   | —                                                         | —                      | —                   |
|          | 100         | n-channel | 0.0167±0.0023                                       | 0.0190                                                    | $\sim 9.2 \times 10^6$ | 9.1±4.3             |
|          |             | p-channel | —                                                   | —                                                         | —                      | —                   |
|          | 200         | n-channel | 0.0378±0.0053                                       | 0.0431                                                    | $\sim 7.8 \times 10^5$ | 11.8±6.3            |
|          |             | p-channel | —                                                   | —                                                         | —                      | —                   |

Table S4. Summarized properties of IDT-PTIa:PBDB-T– and IDT-PTIb:PBDB-T–based OPVs

| Active Materials | Anneal | $J_{SC} / \text{mAcm}^{-2}$ | $V_{OC} / \text{V}$ | FF        | PCE / % | $PCE^{max} / \%$ |
|------------------|--------|-----------------------------|---------------------|-----------|---------|------------------|
| IDT-PTIa:PBDB-T  | —      | 8.60±0.42                   | 0.83±0.01           | 0.49±0.02 | 3.2±0.6 | 3.8              |
|                  | 200    | 12.32±0.46                  | 0.78±0.01           | 0.48±0.03 | 4.7±0.4 | 5.1              |
| IDT-PTIb:PBDB-T  | —      | 7.57±0.33                   | 0.86±0.01           | 0.50±0.01 | 3.3±0.2 | 3.5              |
|                  | 200    | 10.06±0.45                  | 0.82±0.00           | 0.56±0.02 | 4.7±0.2 | 4.9              |

## 16. NMR charts

### *N,N'*-bis(1-pentylhexyl)-1-bromoperylene-3,4,9,10-tetracarboxydiimide (**1a**)

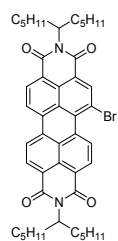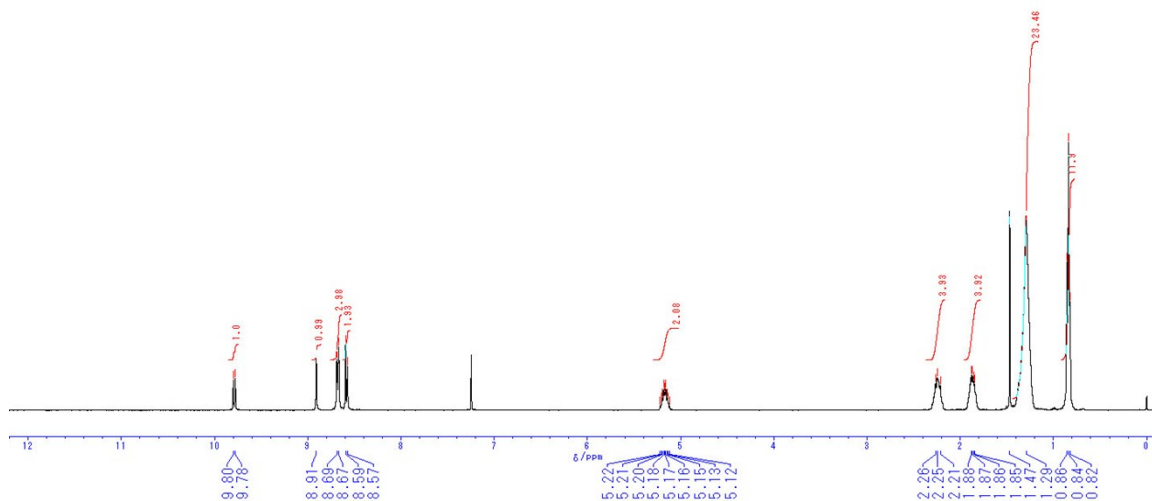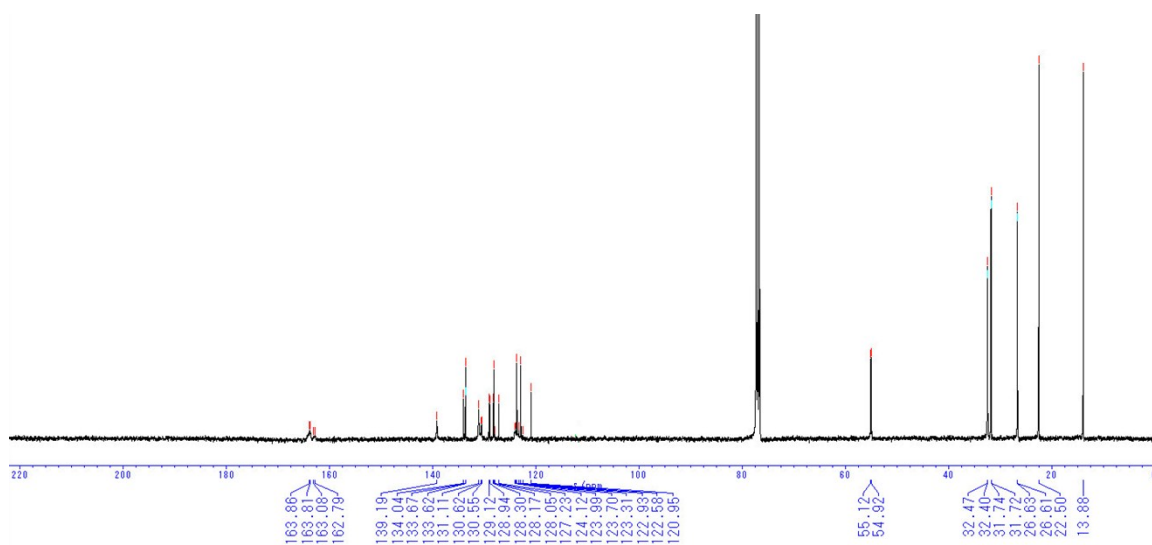

***N,N'*-Bis(1-pentylhexyl)-2-iodoperylene-3,4,9,10-tetracarboxydiimide (1b)**

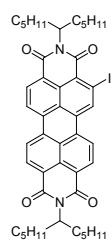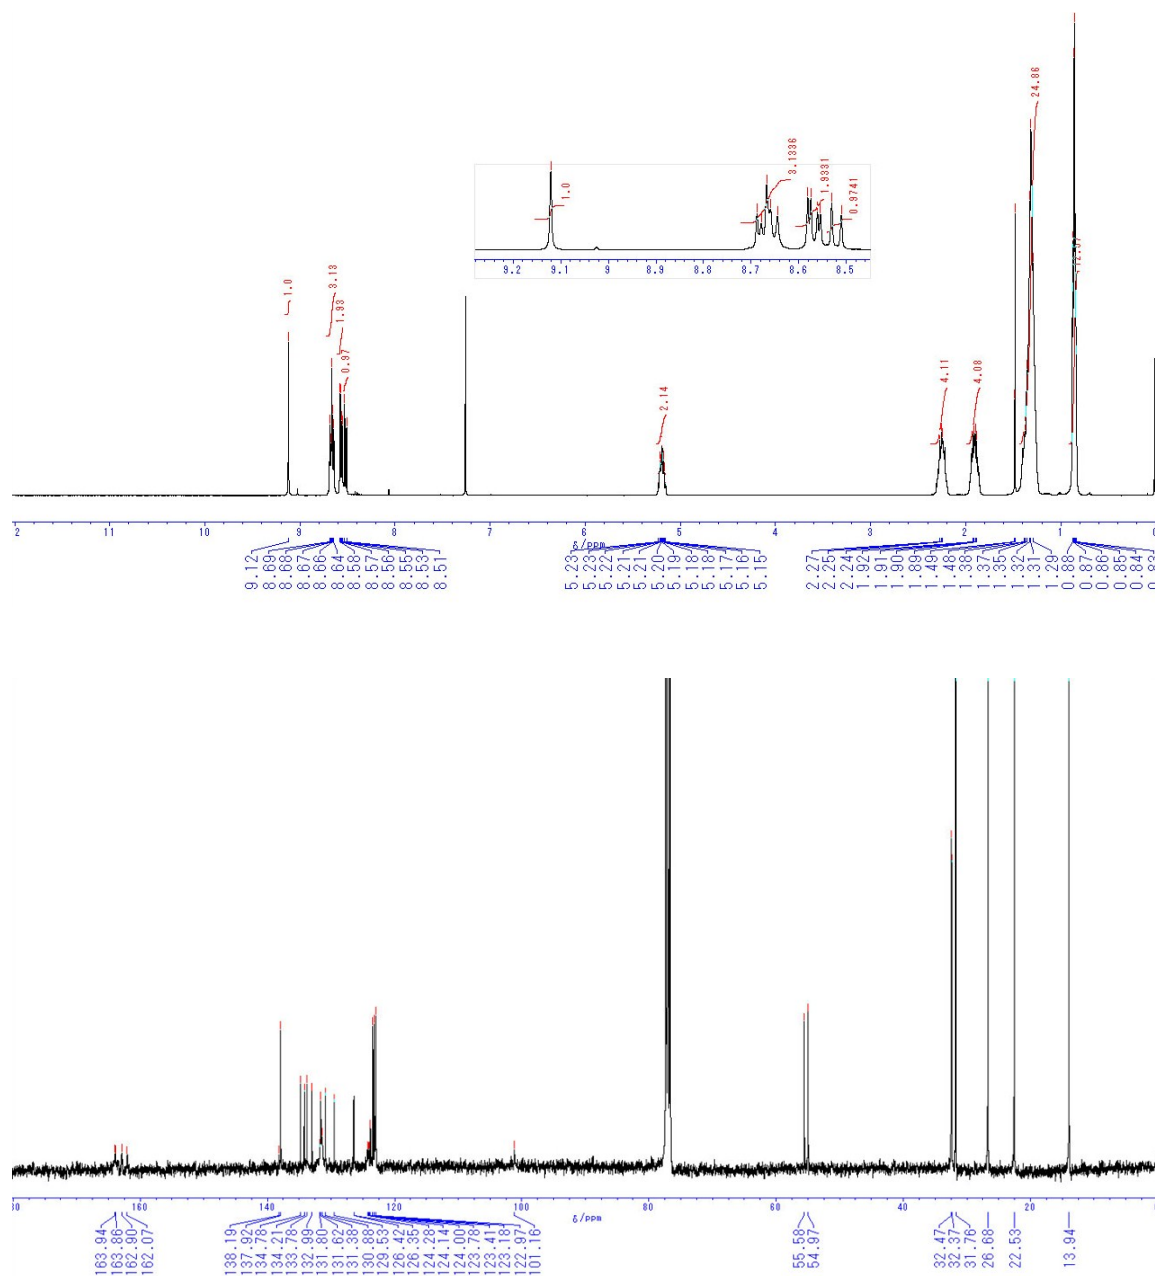

***N,N'*-Bis(1-pentylhexyl)-1-(triethylsilyl-ethynyl)-perylene-3,4,9,10-tetracarboxydiimide (2a)**

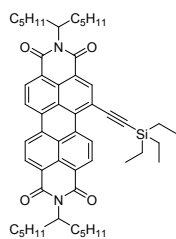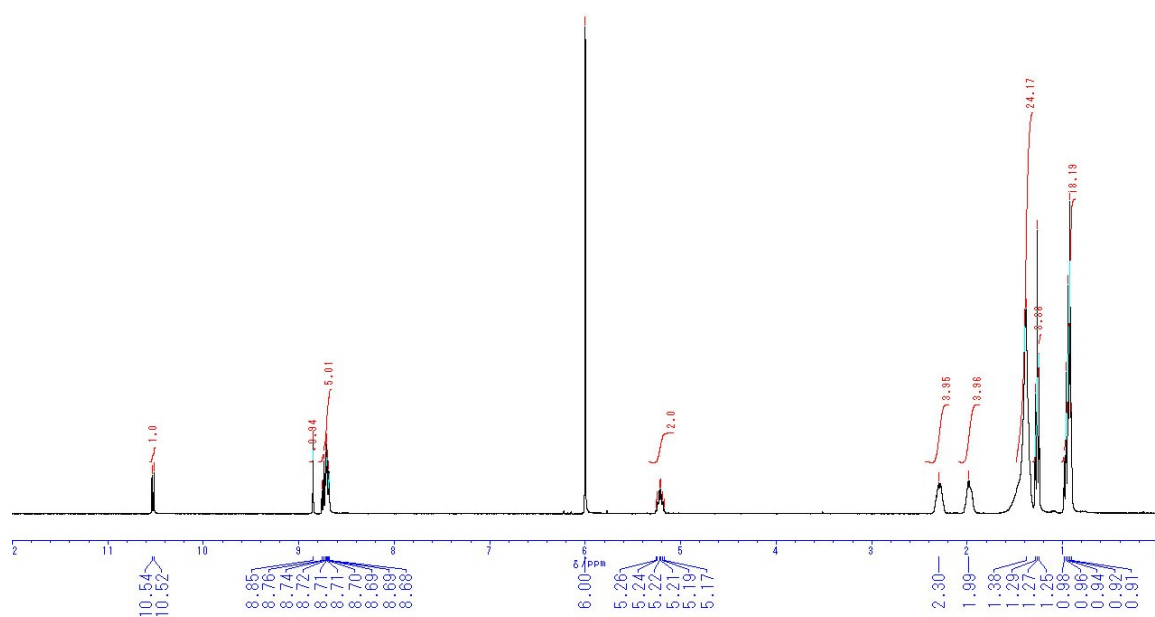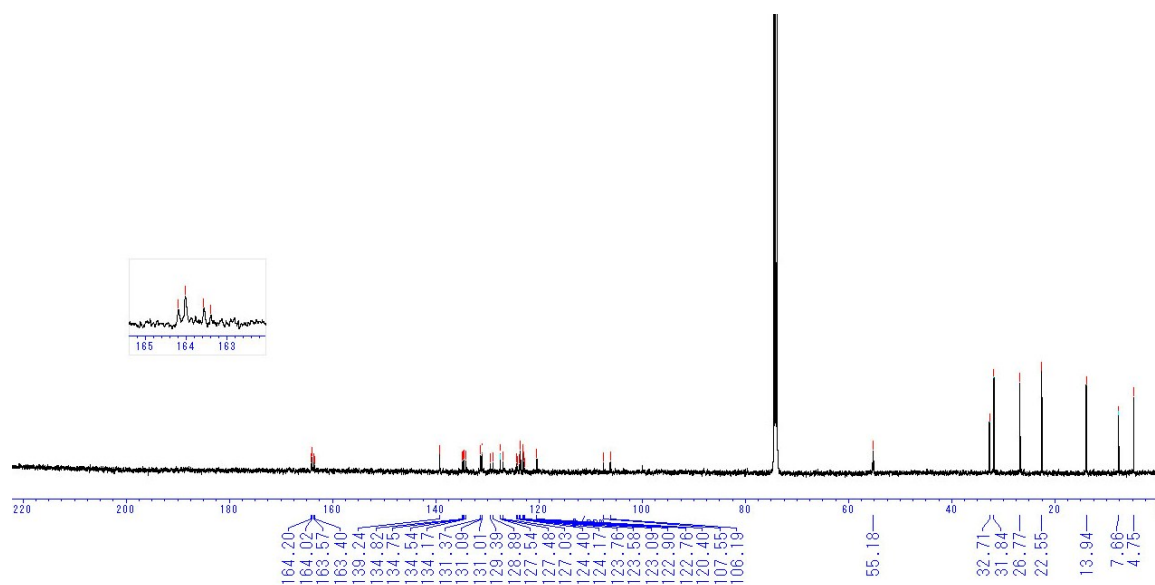

***N,N'*-Bis(1-pentylhexyl)-2-(triethylsilyl)ethynyl-perylene-3,4,9,10-tetracarboxydiimide (2b)**

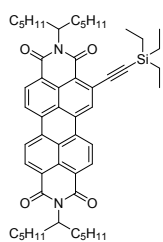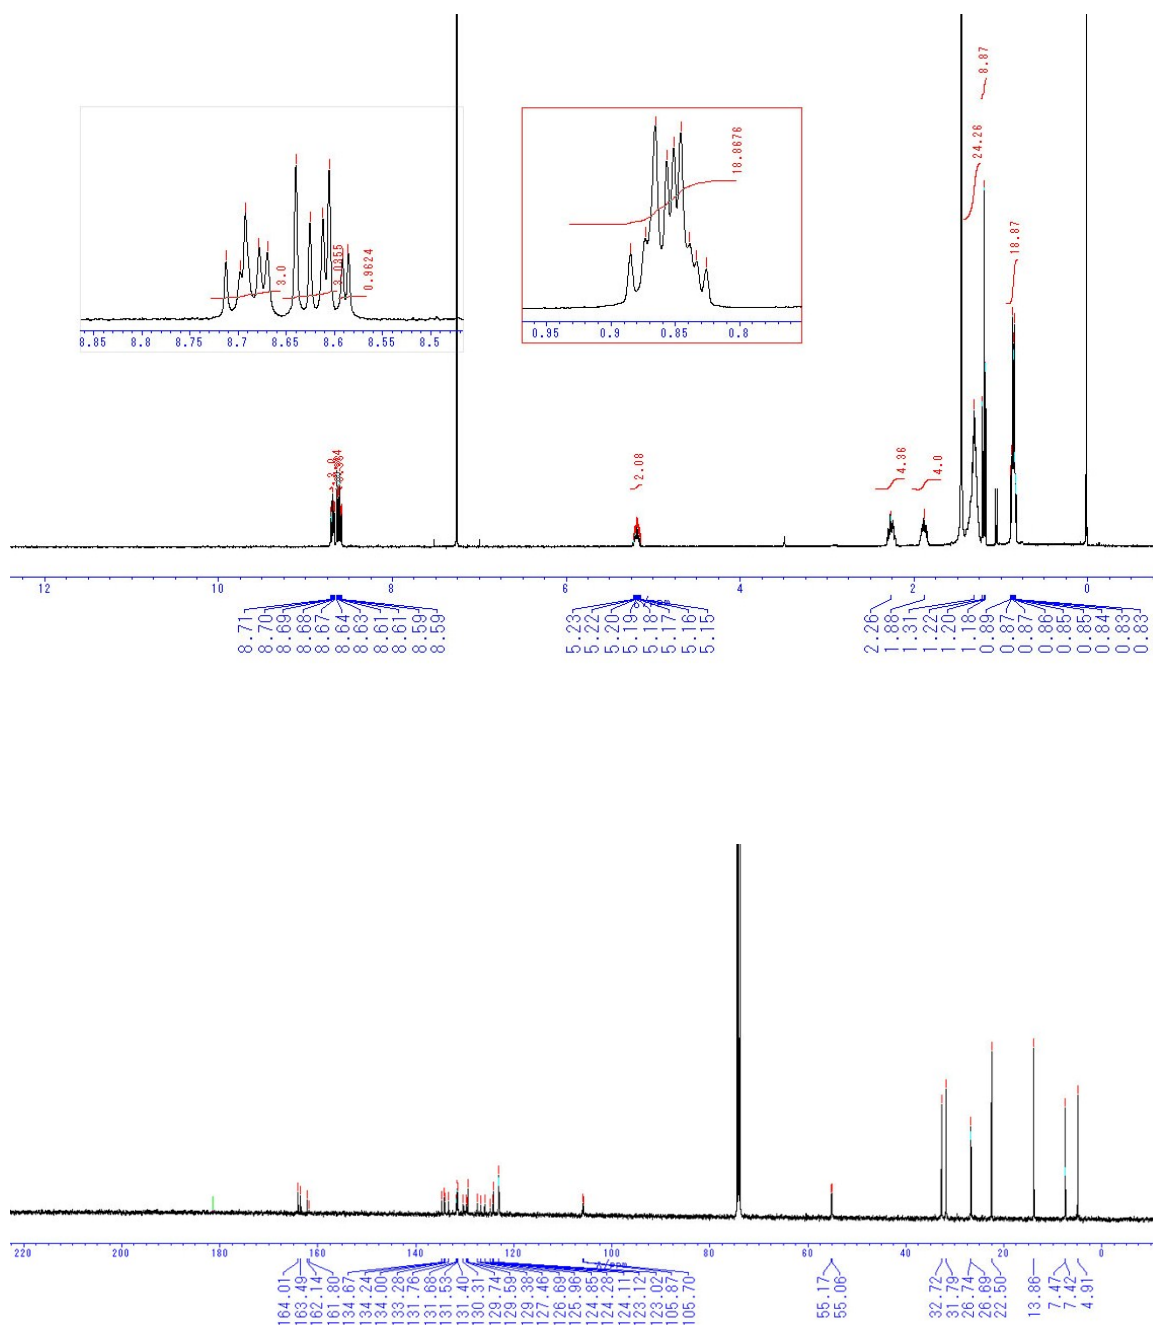

***N,N'*-Bis(1-pentylhexyl)-2-(triethylsilyl)-perylene[2,1-*b*]thiophene-6,7,12,13-**

**tetracarboxydiimide (TES-PTIa)**

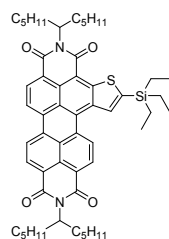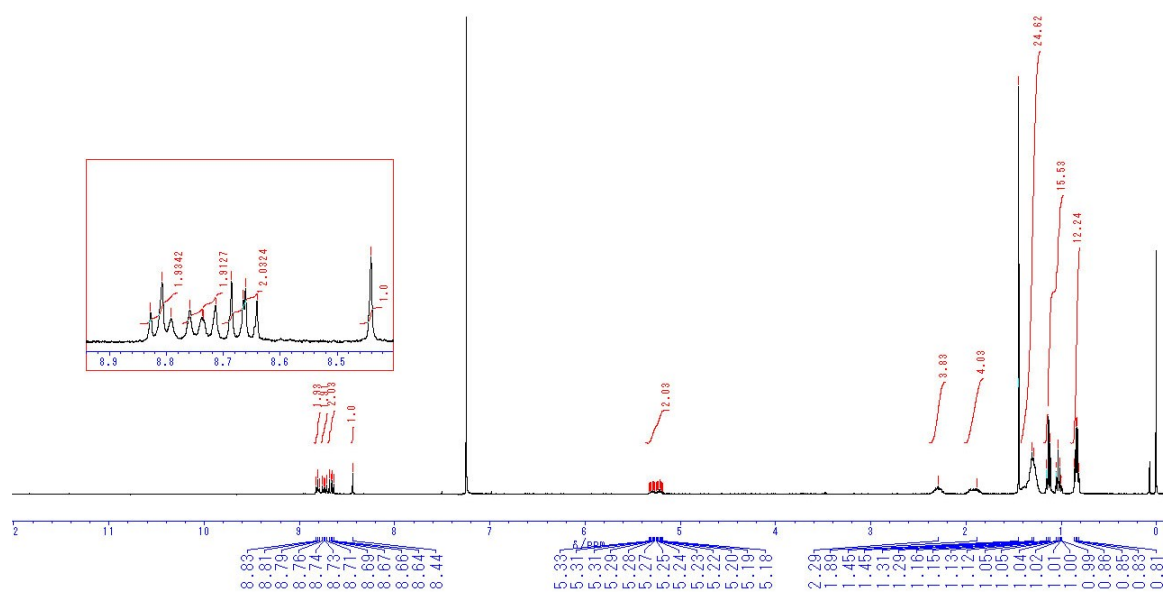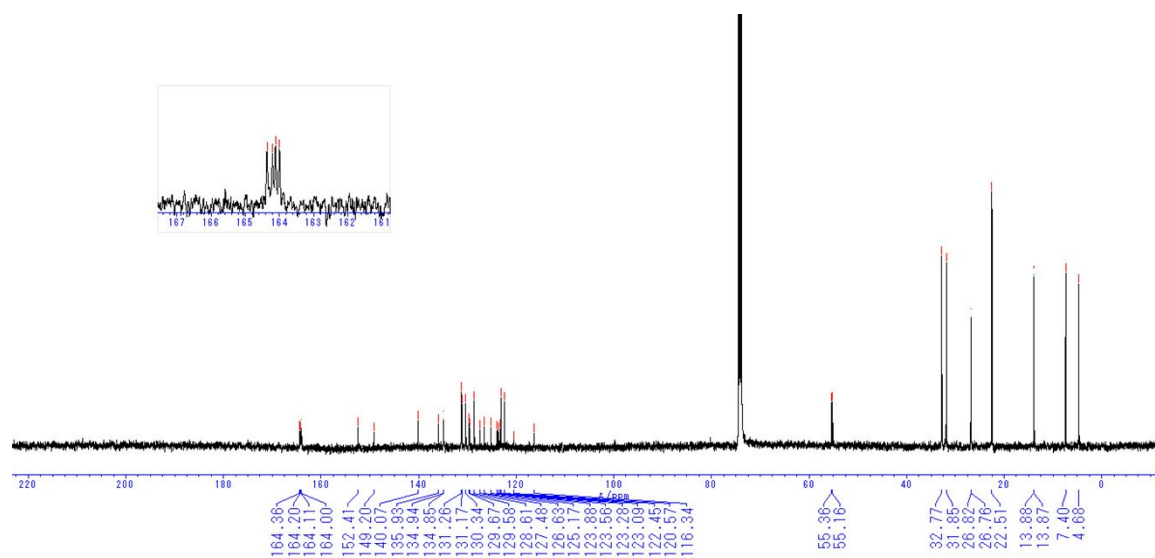

***N,N'*-Bis(1-pentylhexyl)-2-(triethylsilyl)-perylene[1,2-*b*]thiophene-4,5,10,11-tetracarboxydiimide (TES-PTIb)**

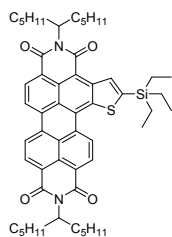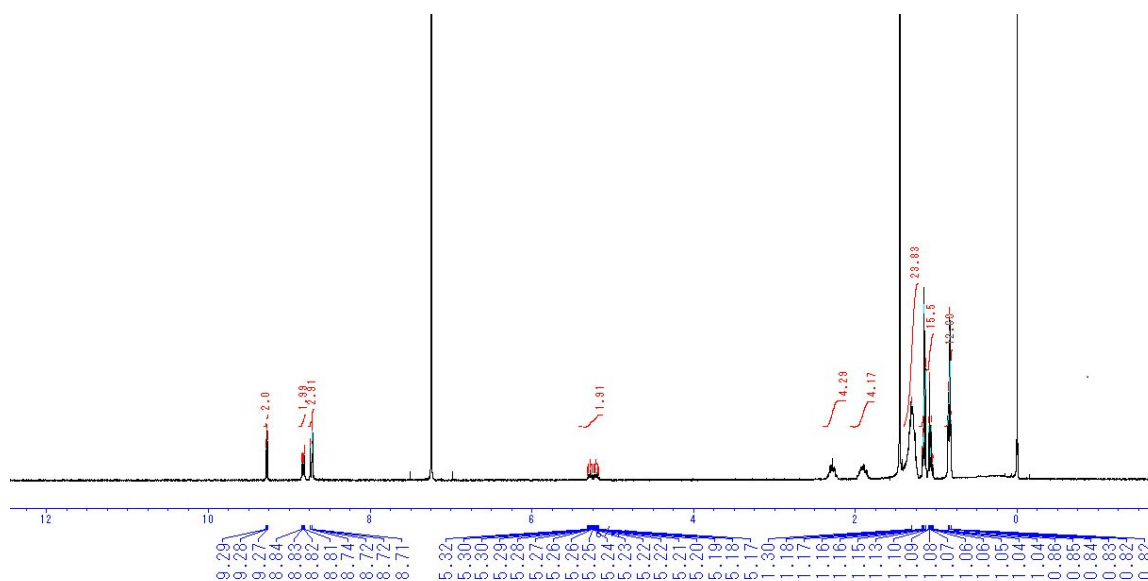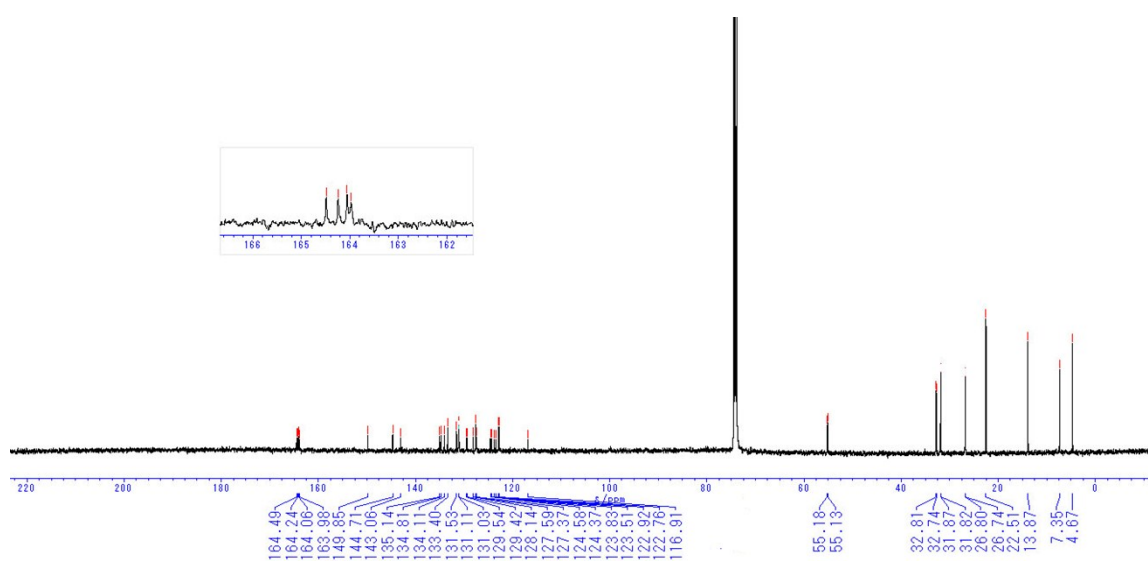

***N,N'*-Bis(1-pentylhexyl)-perylene[2,1-*b*]thiophene-6,7,12,13-tetracarboxydiimide (PTIa)**

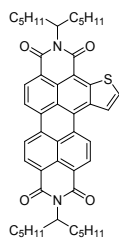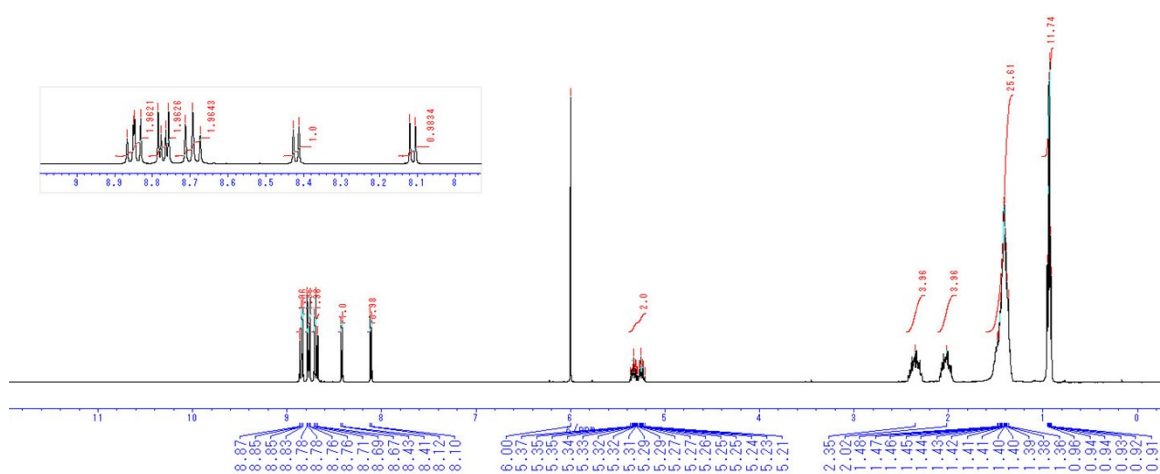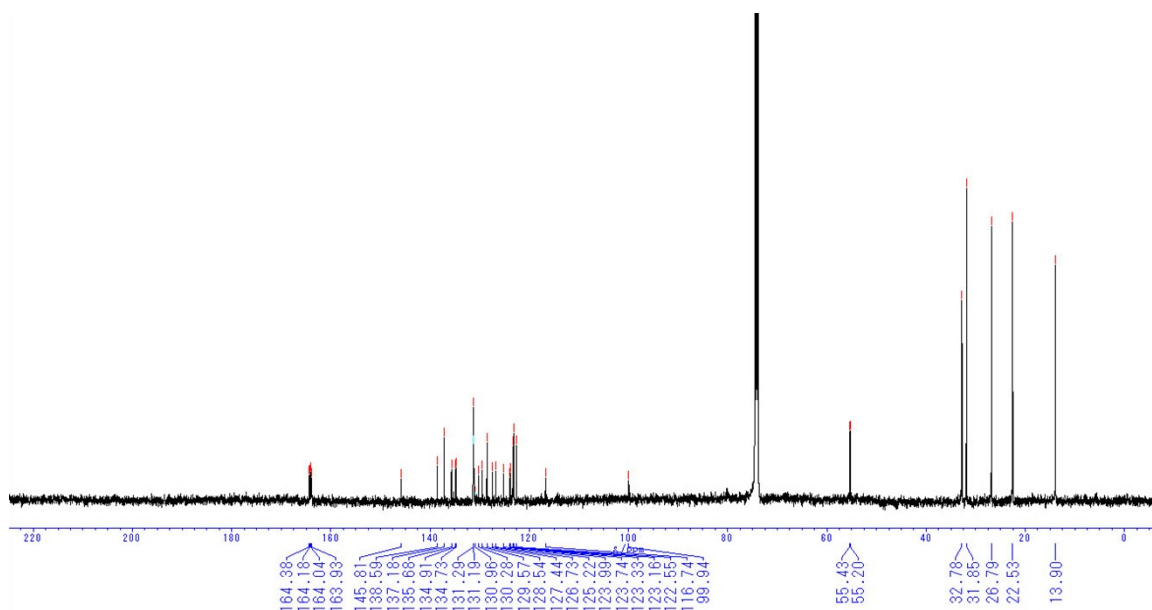

***N,N'*-Bis(1-pentylhexyl)-perylene[1,2-*b*]thiophene-4,5,10,11-tetracarboxydiimide (PTIb)**

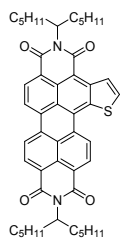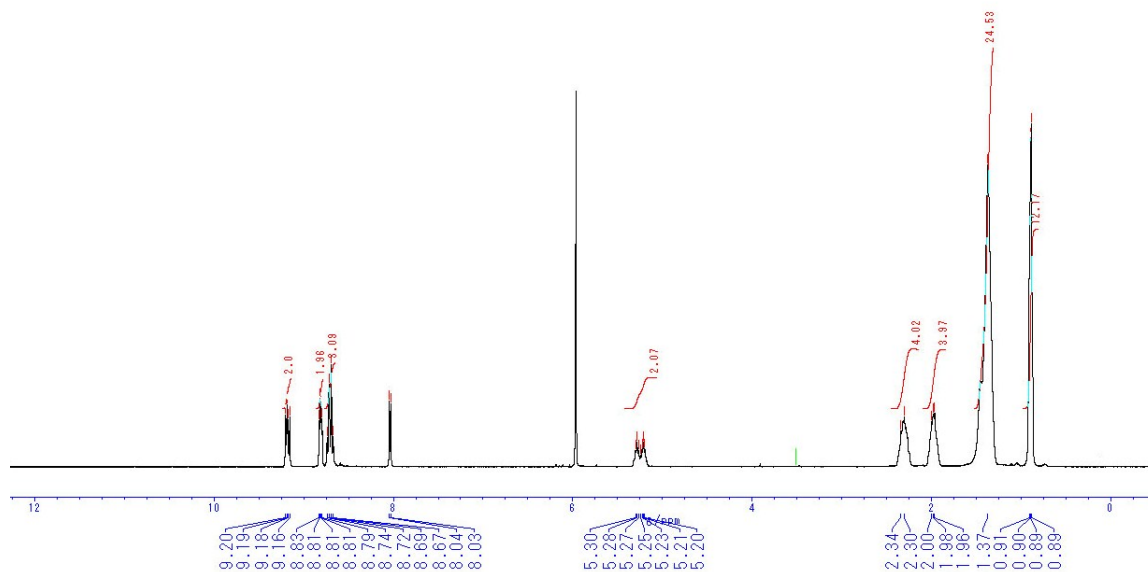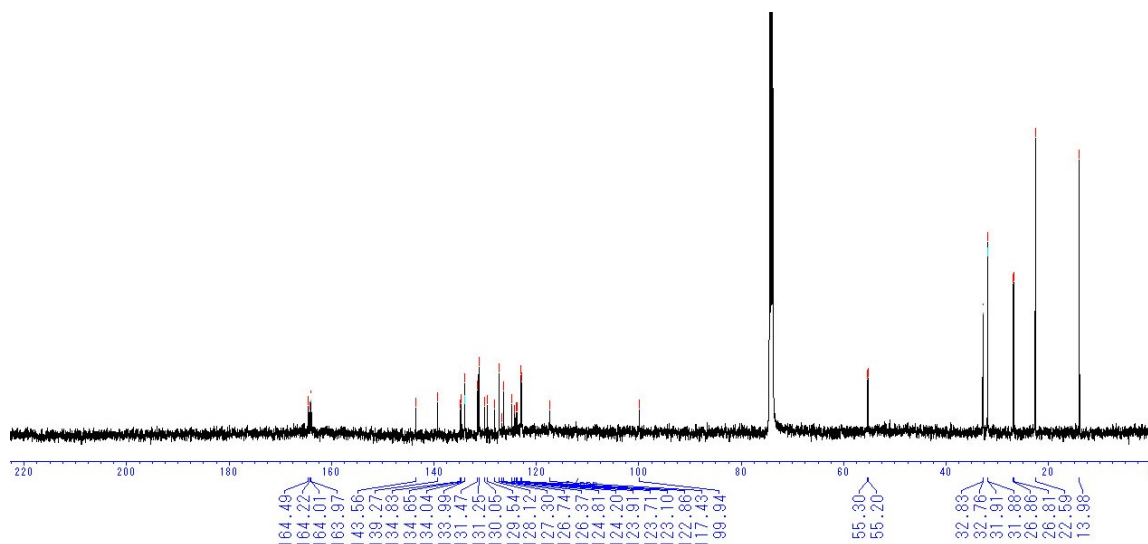

***N,N'*-Bis(1-pentylhexyl)-2-bromoperyleno[2,1-*b*]thiophene-6,7,12,13-tetracarboxydiimide (Br-PTIa)**

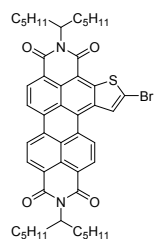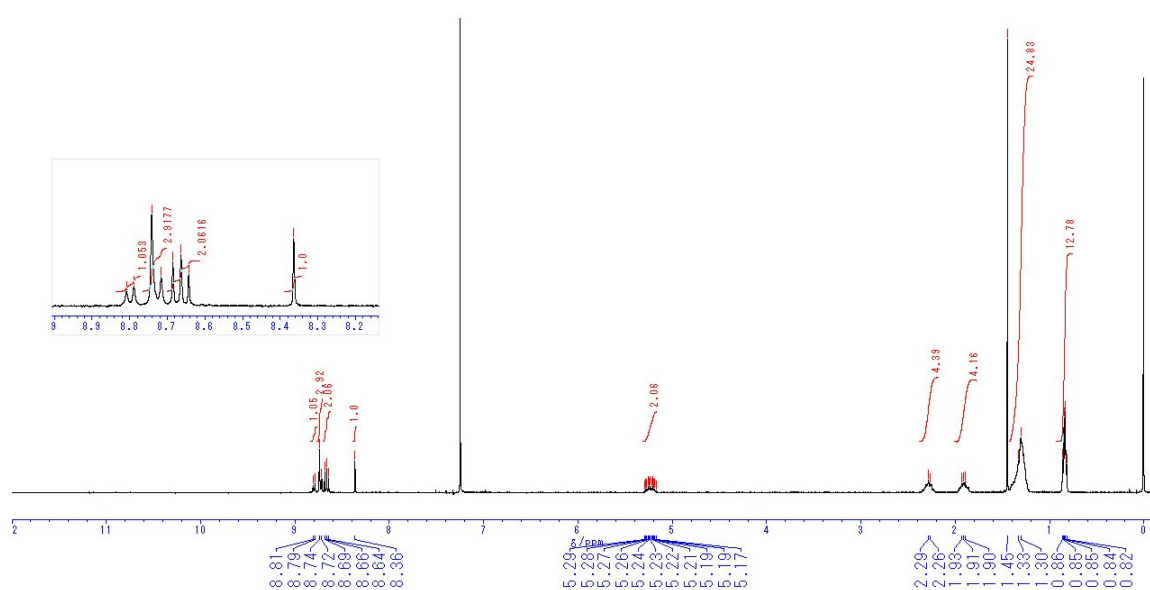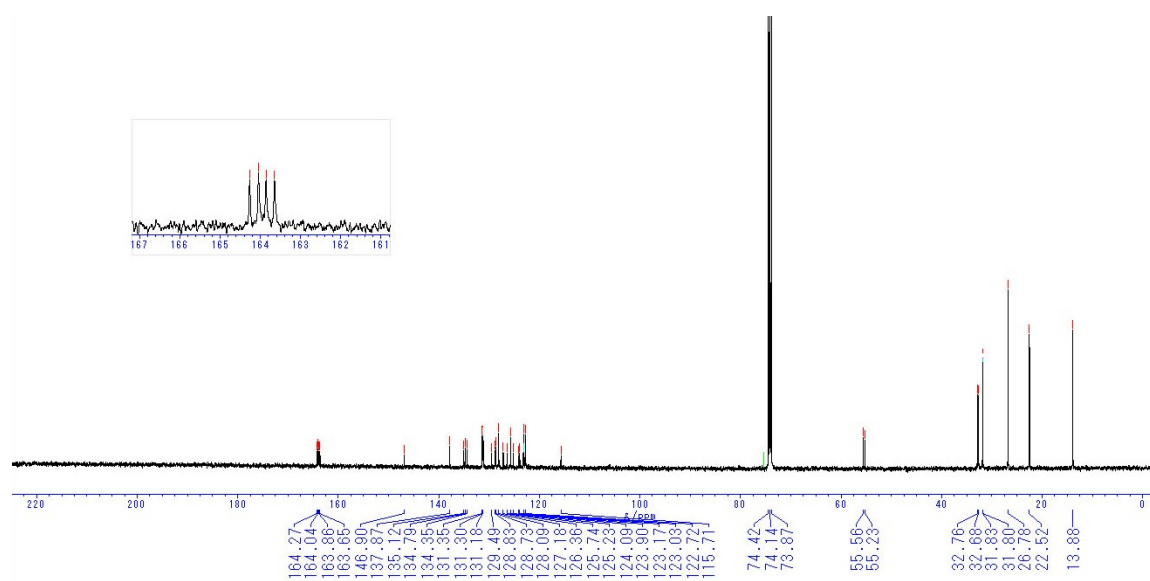

***N,N'*-Bis(1-pentylhexyl)-2-bromoperylene[1,2-*b*]thiophene-4,5,10,11-tetracarboxydiimide (Br-PTIb)**

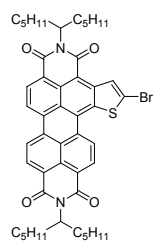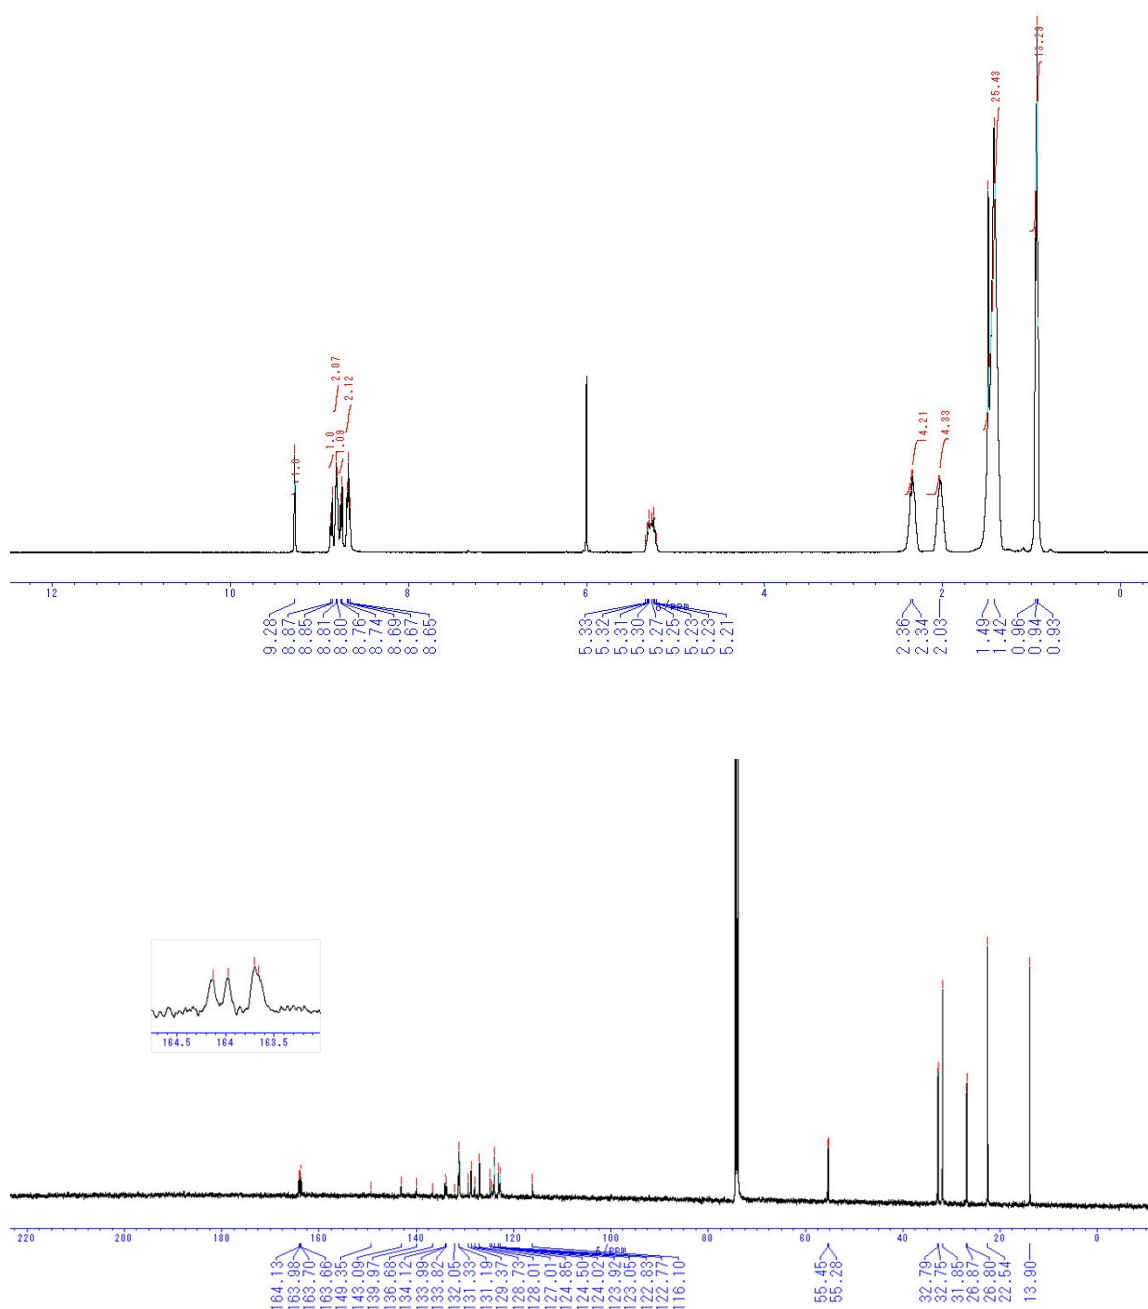

**[2,2']Bi[perylene[2,1-*b*]thienyl]-*N,N',N'',N'''*-tetrakis(1-pentylhexyl)-6,6',7,7',12,12',13,13'-tetraimide (dPTIa)**

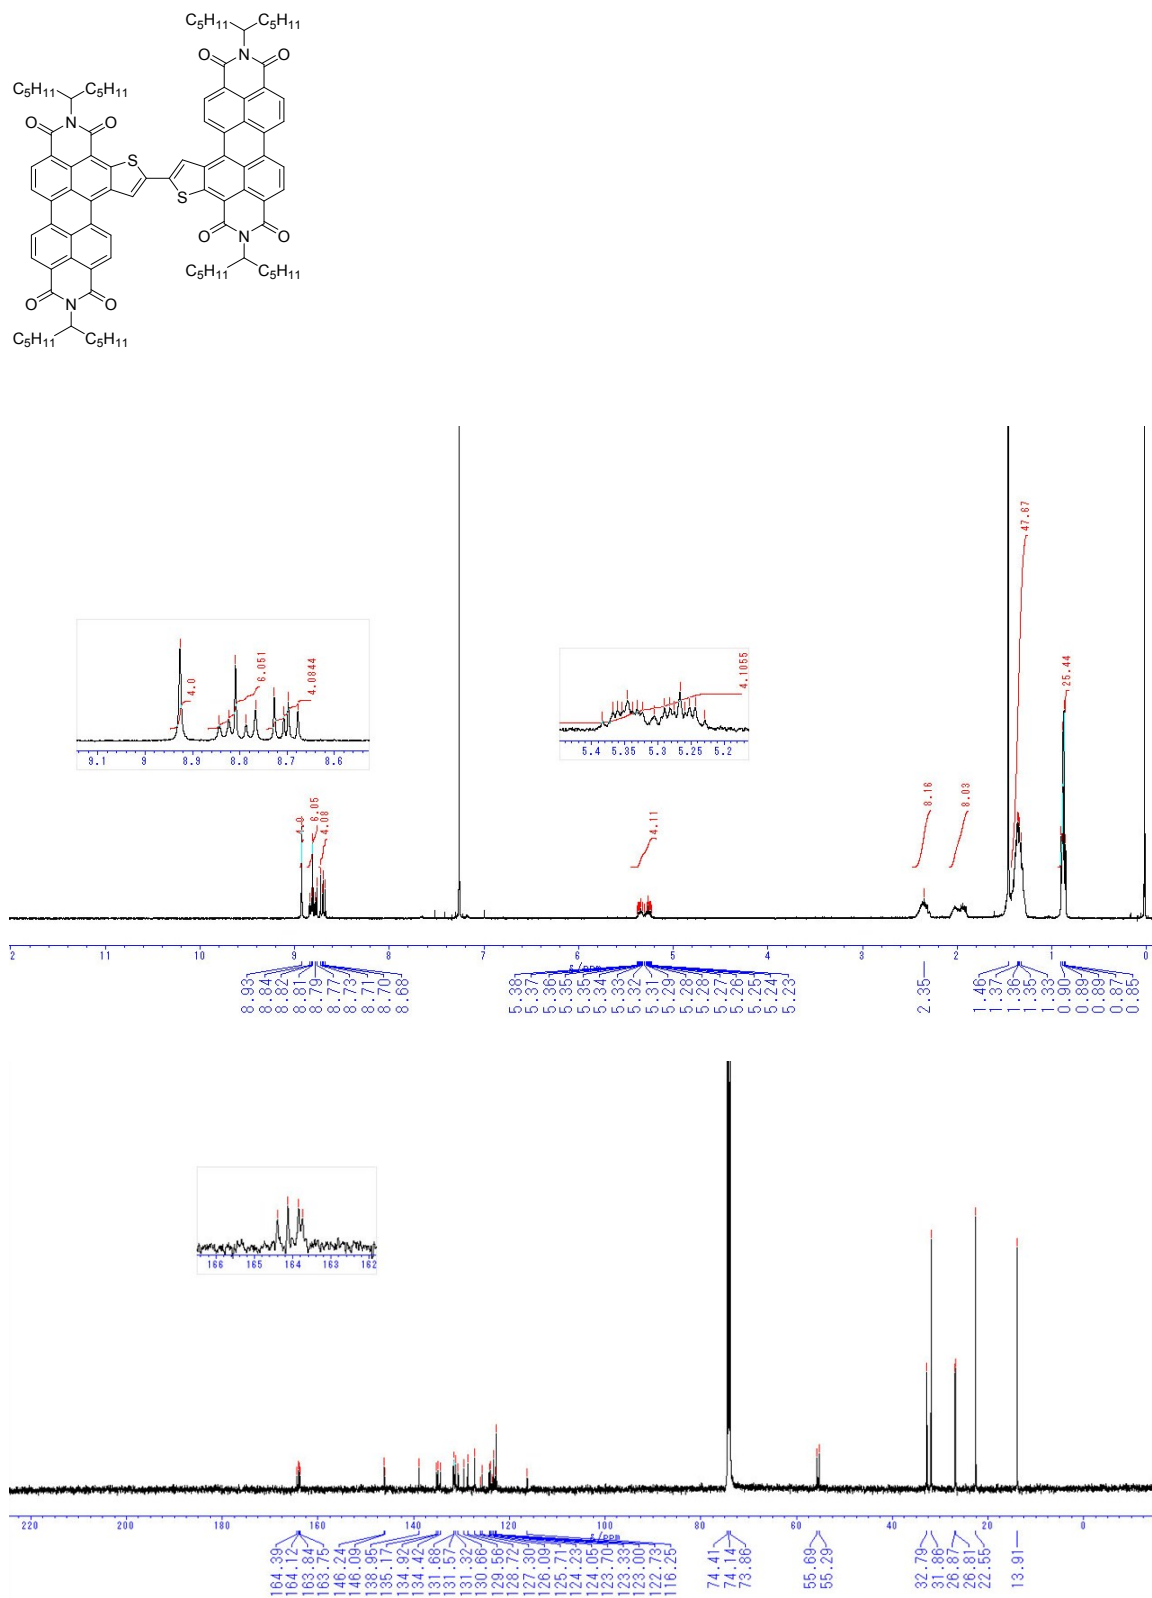

**[2,2']Bi[perylene[1,2-*b*]thienyl]-*N,N',N'',N'''*-tetrakis(1-pentylhexyl)-4,4',5,5',10,10',11,11'-tetraimide (dPTIb)**

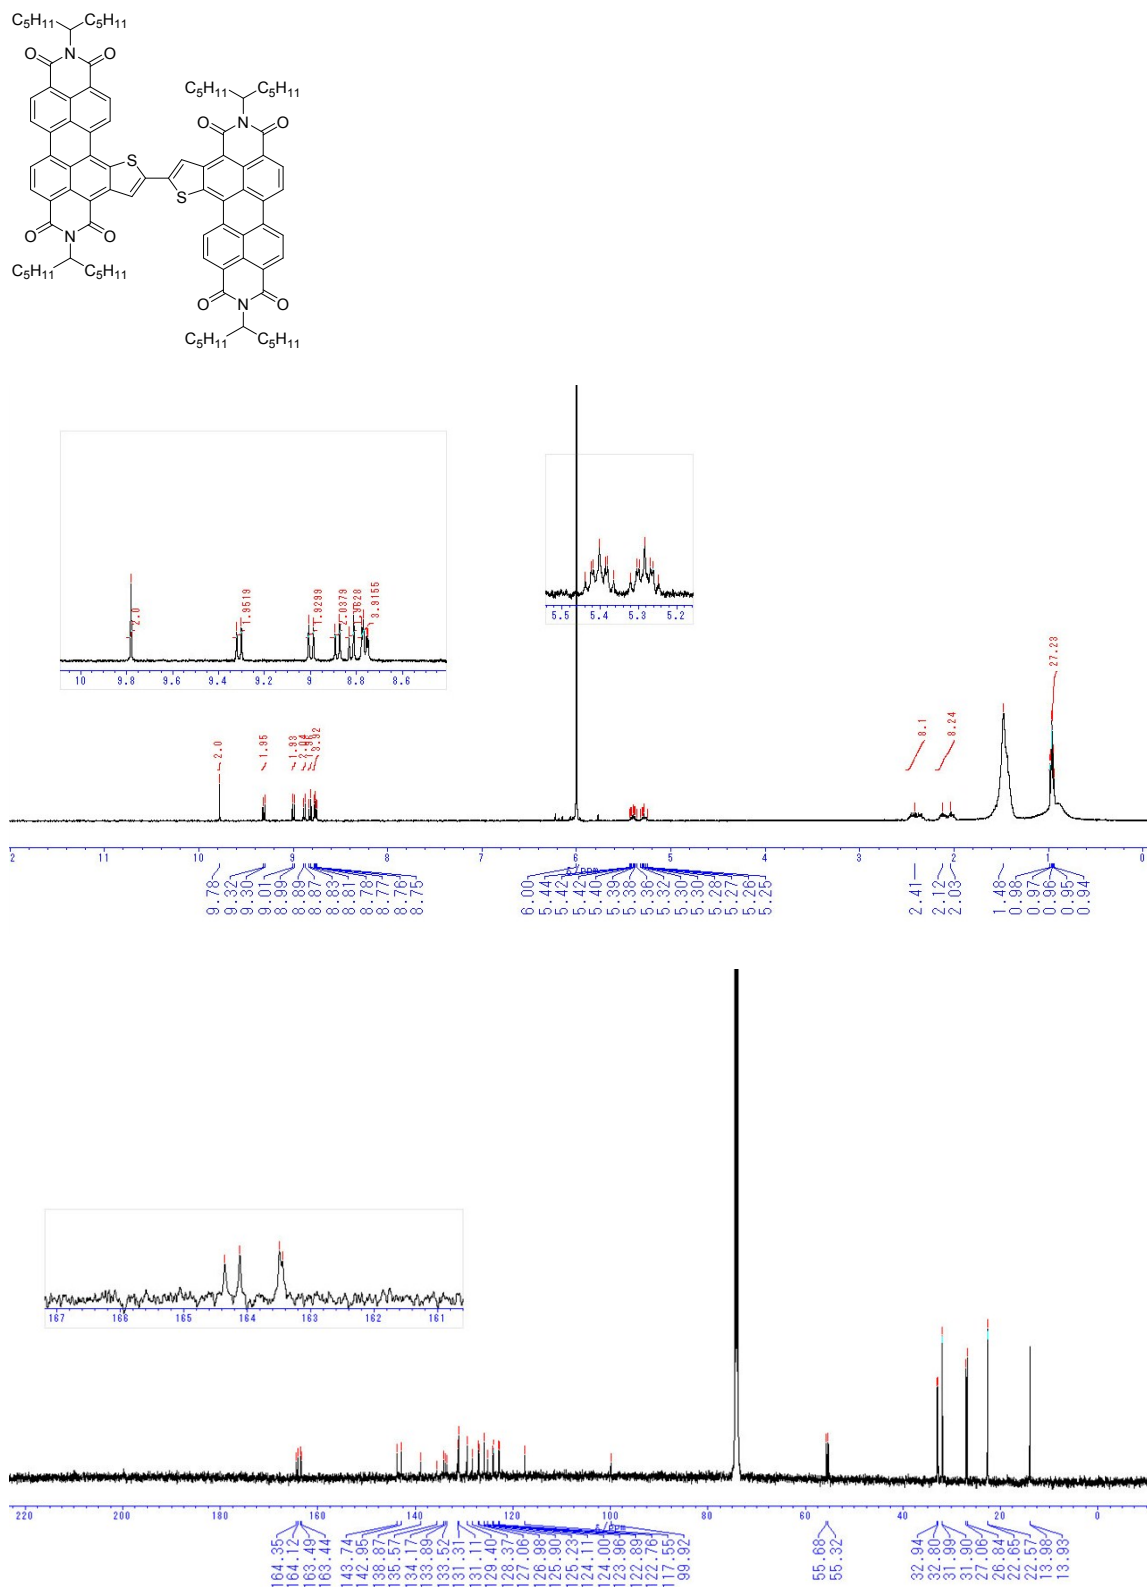

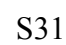

***N,N',N'',N'''*-Tetrakis(1-pentylhexyl)-2,7-bis(peryleno[1,2-*b*]thiophen-2-yl)-4,4,9,9-tetrakis(4-hexylphenyl)-s-indaceno[1,2-*b*:5,6-*b'*]dithiophene-4',4'',5',5'',10',10'',11',11''-octacarboxytetraimide (IDT-PTIb)**

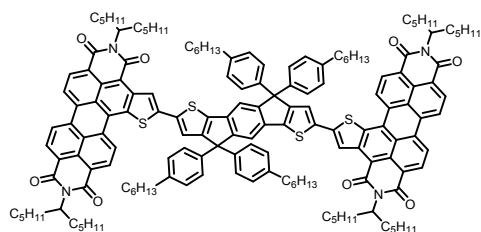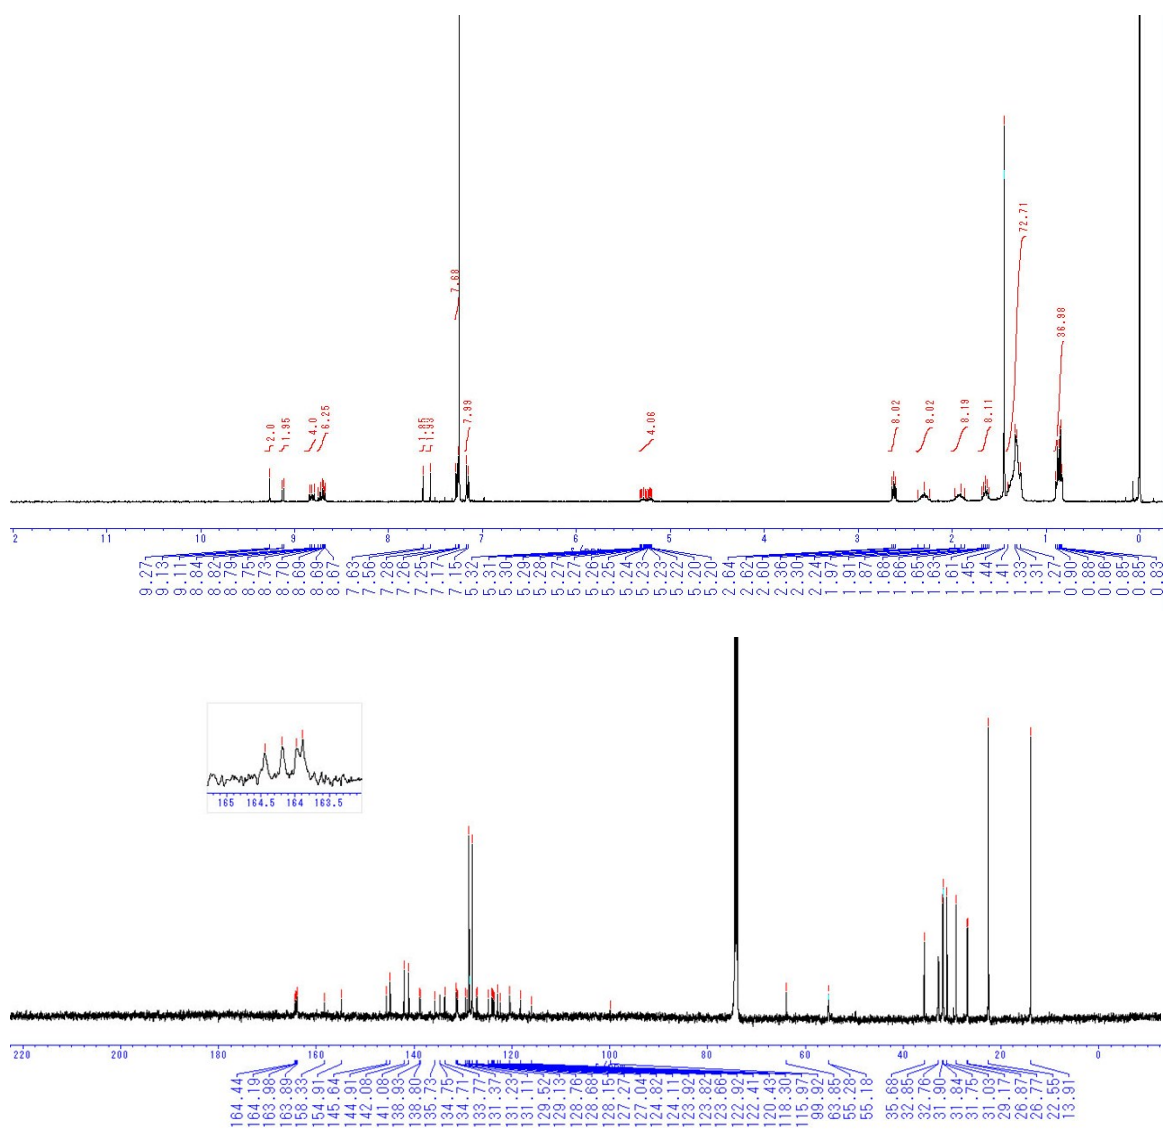

## 17. References

---

<sup>1</sup> P. Rajasingh, R. Cohen, E. Shirman, L. J. W. Shimon, B. Rybtchinski, *J. Org. Chem.*, 2007, **72**, 5973–5979.

<sup>2</sup> J. Jiajun, D. He, L. Zhang, Y. liu, X. Mo, J. Lin, H.-J Zhang, *Org. Lett.*, 2017, **19**, 5438–5441.

<sup>3</sup> N. V. Handa, K. D. Mendoza, L. D. Shirtcliff, *Org. Lett.*, 2011, **13**, 4724–4727.

<sup>4</sup> K. Takimiya, H. Ebata, K. Sakamoto, T. Izawa, T. Otsubo, Y. Kunugi, *J. Am. Chem. Soc.*, 2006, **128**, 12604–12605.
